# Supplementary material for: Involvement of Autophagy in Antitumor Activity of Folate-appended Methyl-β-cyclodextrin
Source: PubMed Central journal article supplement — Sci Rep. 2014 Mar 20;4:4417. doi: 10.1038/srep04417 (PMC3960581; doi:10.1038/srep04417), 2014-03-20
Supplement: srep04417-s1.pdf [file srep04417-s1.pdf]

## Supplementary information

### Involvement of Autophagy in Antitumor Activity of Folate-appended Methyl- $\beta$ -cyclodextrin

Risako Onodera<sup>1</sup>, Keiichi Motoyama<sup>1</sup>, Nao Tanaka<sup>1</sup>, Ayumu Ohyama<sup>1,3</sup>, Ayaka Okamatsu<sup>1</sup>, Taishi Higashi<sup>1</sup>, Ryusho Kariya<sup>2</sup>, Seiji Okada<sup>2</sup> and Hidetoshi Arima<sup>1,3,\*</sup>

<sup>1</sup> *Department of Physical Pharmaceutics, Graduate School of Pharmaceutical Sciences, Kumamoto University, 5-1 Oe-honmachi, Chuo-ku, Kumamoto 862-0973, Japan,*

<sup>2</sup> *Division of Hematopoiesis, Center for AIDS Research, Kumamoto University, 2-2-1 Honjo, Chuo-ku, Kumamoto 860-0811, Japan*

<sup>3</sup> *Program for Leading Graduate Schools “HIGO (Health life science: Interdisciplinary and Global Oriented) Program”, Kumamoto University*

*\*Corresponding author*

Hidetoshi Arima, Department of Physical Pharmaceutics, Graduate School of Pharmaceutical Sciences, Kumamoto University, 5-1 Oe-honmachi, Chuo-ku, Kumamoto 862-0973, Japan

TEL.: +81 96 371 4160

FAX +81 96 371 4420

*E-mail address:* arimah@gpo.kumamoto-u.ac.jp

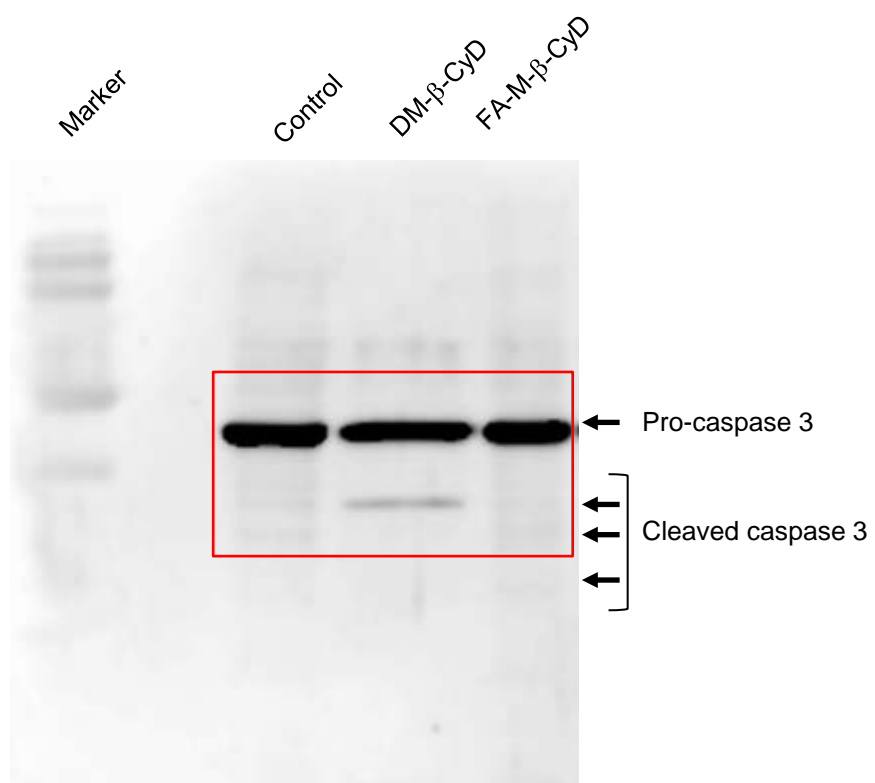

Supplementary Fig. 1
